# Supplementary material
Source: bioRxiv or medRxiv preprint supplement (https://www.medrxiv.org/highwire/filestream/77087/field_highwire_adjunct_files/1/2020.03.29.20046706-2.pdf)

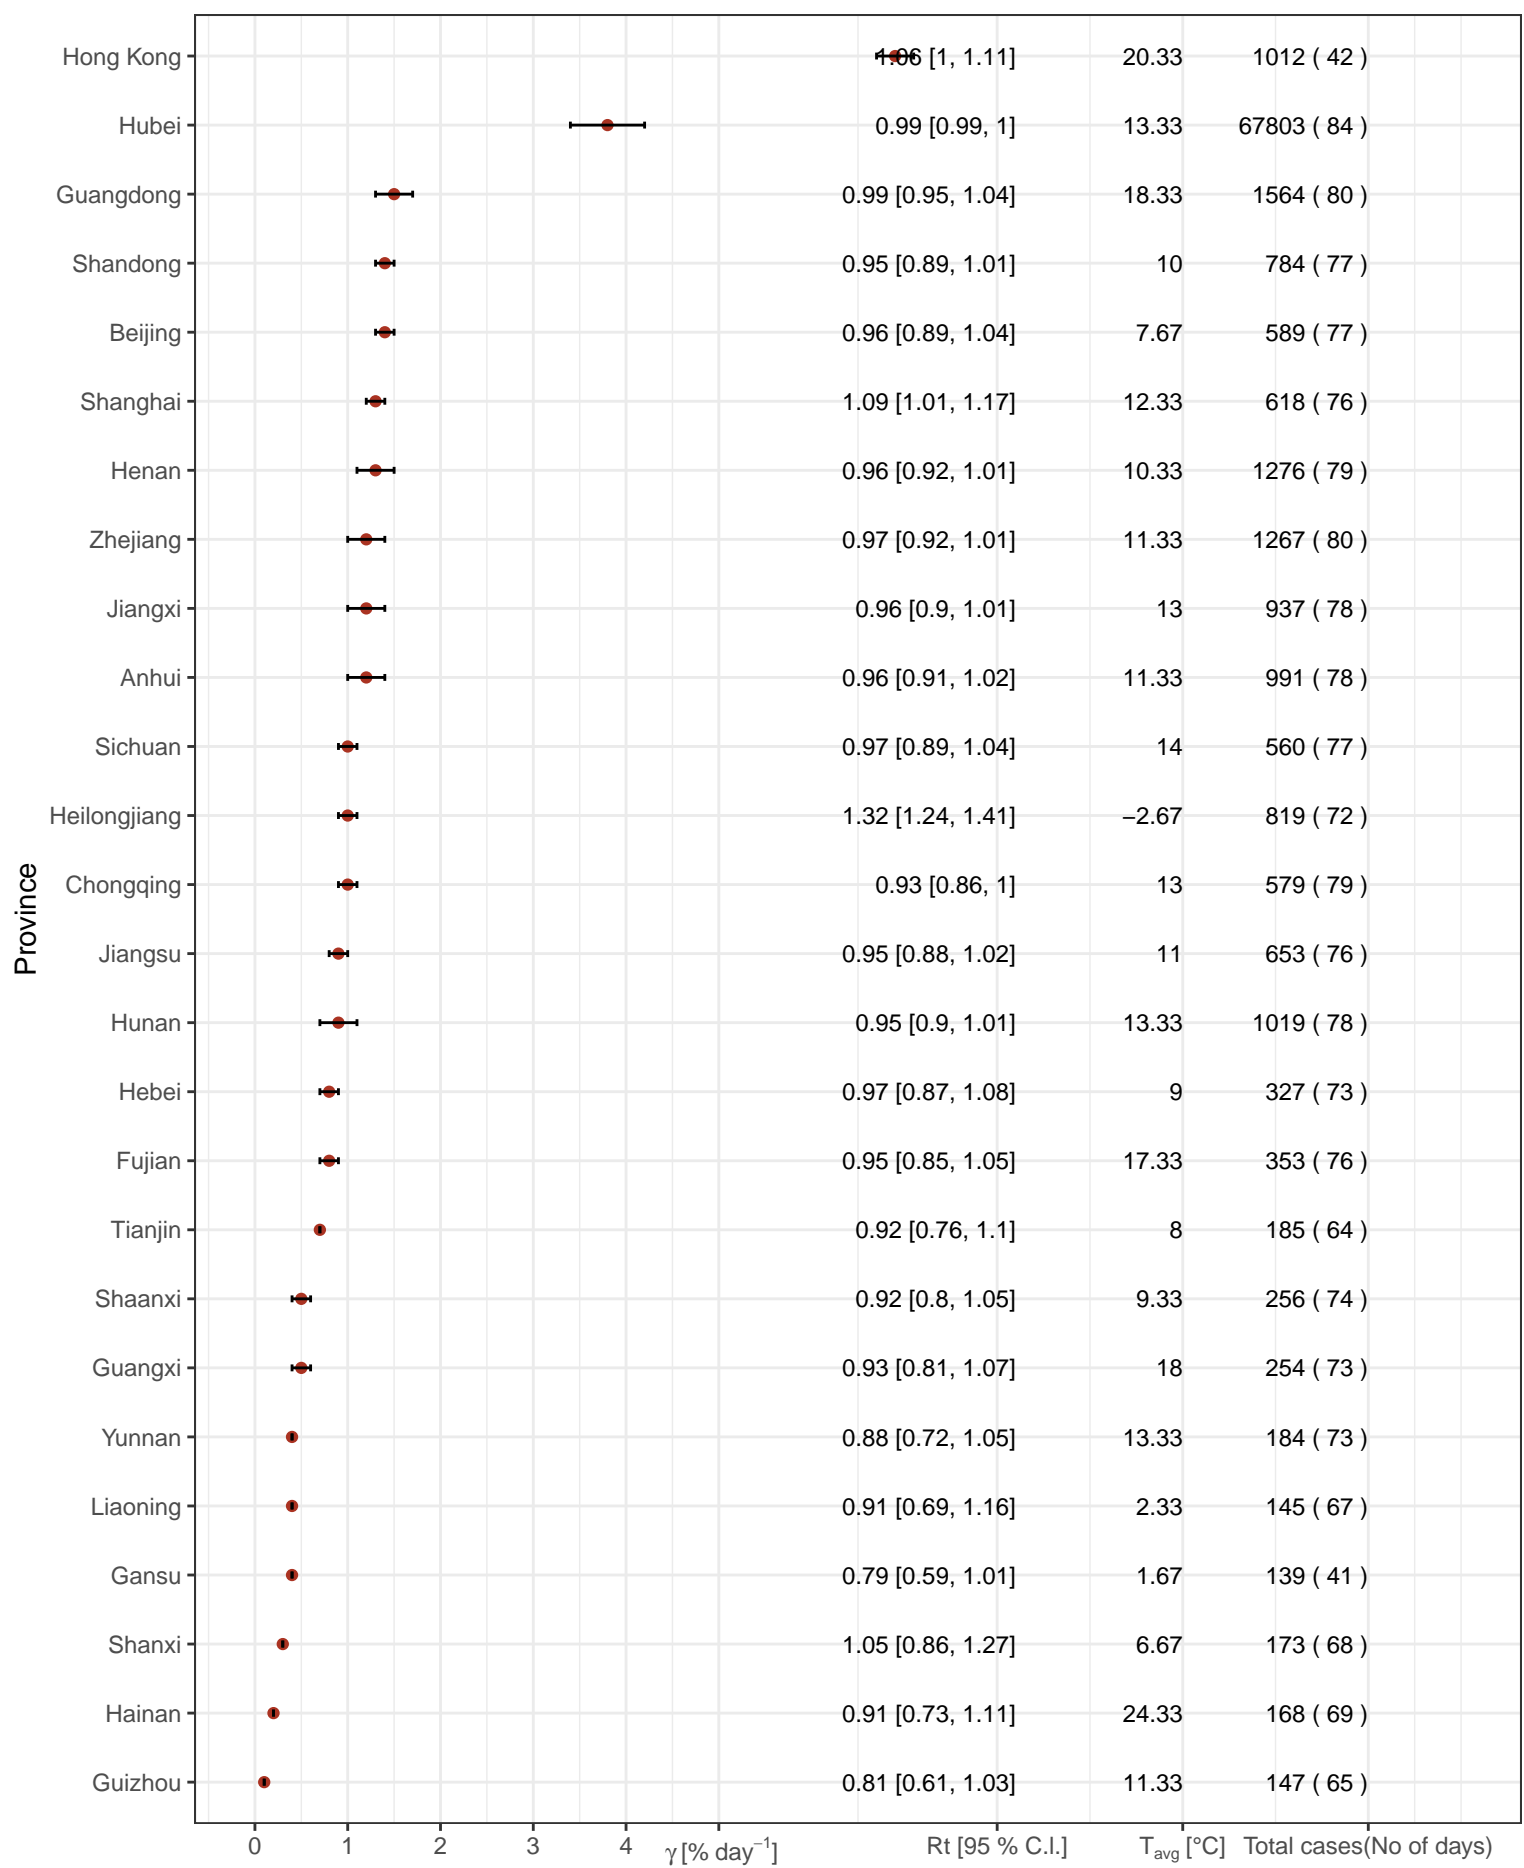

Supplement: Supplementary file [file 2020.03.29.20046706-2.pdf]
